# Supplementary material
Source: PubMed Central journal article supplement (PMC4891296)
Supplement: NIHMS750550-supplement-Appendix.pdf [file NIHMS750550-supplement-Appendix.pdf]

**Appendix.** Characteristics of responding and non-responding schools

| Characteristic                              | Respondents                    | Non-Respondents               | $\beta$ (p-value) |
|---------------------------------------------|--------------------------------|-------------------------------|-------------------|
|                                             | % Total                        | % Total                       |                   |
| School has football team                    | 68.1%                          | 54.6%                         | 1.77 (<0.001)     |
| NCAA Division I                             | 43.3%                          | 22.3%                         | Referent          |
| NCAA Division II                            | 23.2%                          | 33.2%                         | 0.36 (<0.001)     |
| NCAA Division III                           | 33.4%                          | 44.5%                         | 0.39 (<0.001)     |
|                                             | Mean (SD)                      | Mean (SD)                     | $\beta$ (p-value) |
| School athletics revenues <sup>1,2</sup>    | \$17,885,405<br>(\$26,689,097) | \$8,307,818<br>(\$15,715,598) | 1.63 (<0.001)     |
| Total Intercollegiate Athletes <sup>1</sup> | 408.0 (150.0)                  | 333.9 (146.3)                 | 1.00 (<0.001)     |
| Total undergraduate students <sup>1,2</sup> | 7225.1 (7550.0)                | 4483.3 (5287.8)               | 1.24 (<0.001)     |

<sup>1</sup> Measured in a model controlling for presence of a football team and NCAA division of competition

<sup>2</sup> Transformed for normality for regression models using log base 2; presented in raw form in this table.
